# Supplementary material
Source: Research Square preprint supplement (doi:10.21203/rs.3.rs-9234106/v1)
Supplement: Supplementary file 1 [file ca221d2528820baafda7cc2e.docx]

**Supplementary information**

**TETGen: A Transcriptome-Guided Transformer for**

**Targeted Molecule Generation**

Jiahui Gaoa,1, Yanyun Caob,d,1, Rui Zhoua,1, Yingzi Lic, Jiale Wangc, Wanyue Dinga, Mingzhi Mab, Danchen Wua, Yan Zhoub,d*, Bin Yuana,*, Qichao Luoa,c,*

a School of Pharmacy, Anhui Medical University, Hefei 230032, Anhui, China

bThe First Affiliated Hospital of Anhui Medical University, Hefei230032, Anhui, China.

cSchool of Biomedical Engineering, Anhui Medical University, Hefei 230032, Anhui, China

dAnhui Public Health Clinical Center, Anhui Medical University, Hefei 230032, Anhui, China

1These authors contributed equally to this work (co-first authors)

*Corresponding authors. E-mails: Qichao Luo (luoqichao@ahmu.edu.cn); Bin Yuan(yuanbin@ahmu.edu.cn); Yan Zhou (yfyb33719021@fy.ahmu.edu.cn)

**Figures and Tables**


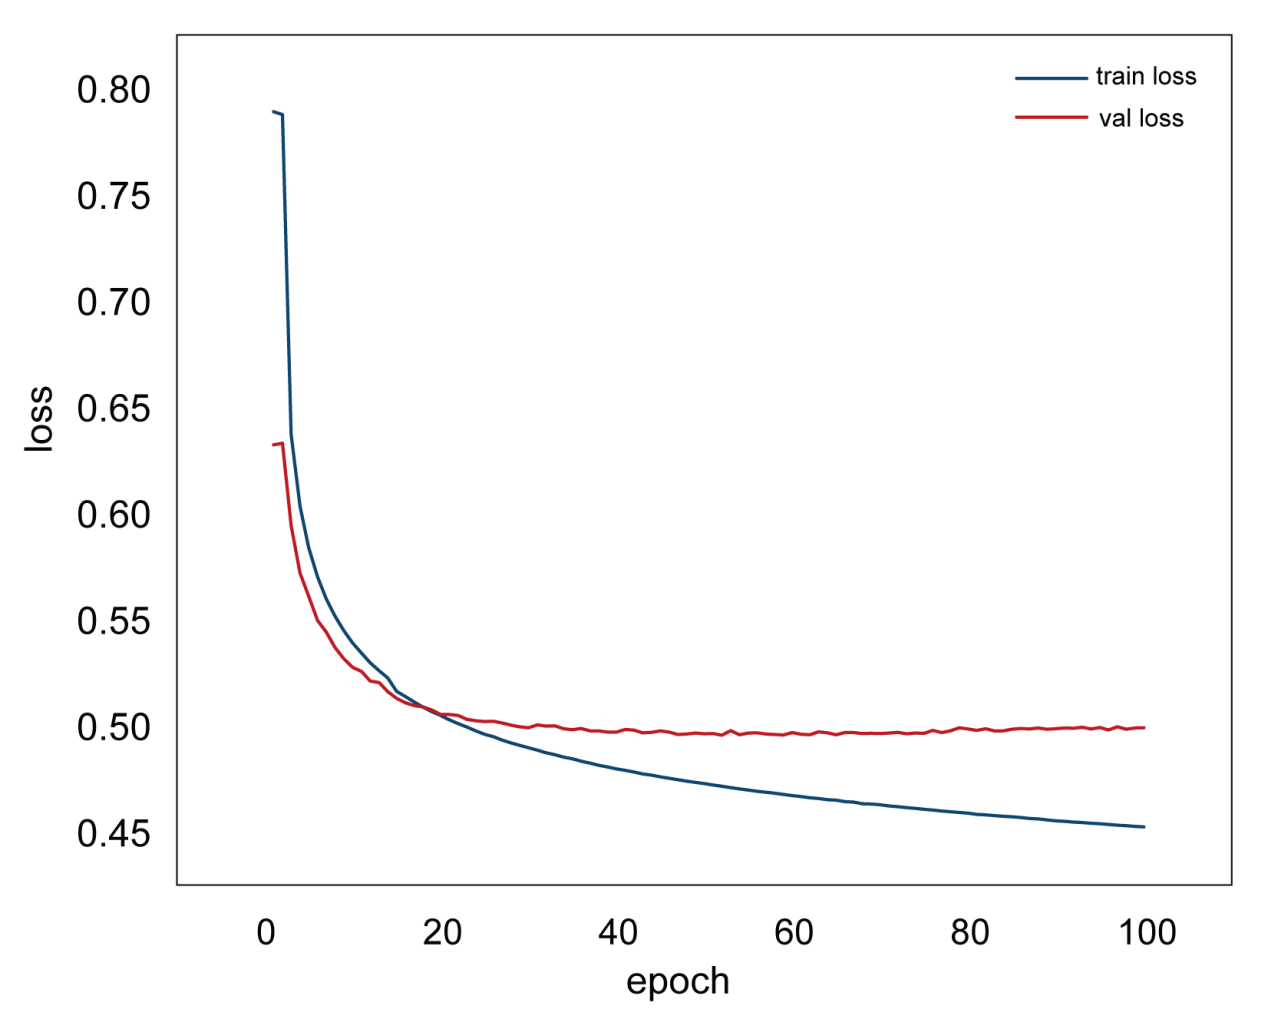


**Figure S1.** GPT Model Pre-training Loss results


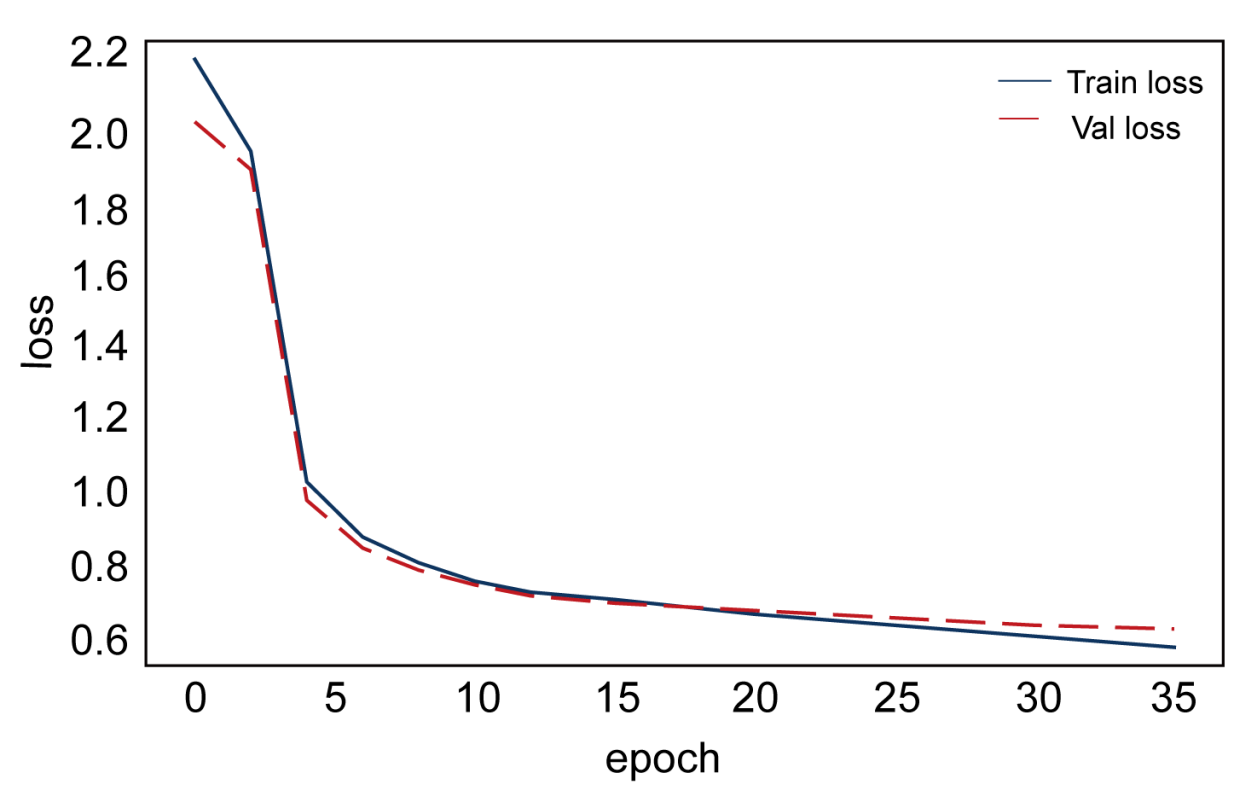


**Figure S2.** TETGen Model Loss results**.**

**Table S1.** Hyperparameters of **GPT** model.

| **Model Parameters** | | | | | | | **Evaluation Metrics** | | | |
| --- | --- | --- | --- | --- | --- | --- | --- | --- | --- | --- |
| **num_layers** | **num_heas** | | **emb_dim** | | **Drop_out** | | **Validity** | **Novelty** | **Uniqueness** | **InDiv** |
| **A.Layers Search** | | | | | | |  |  |  |  |
| 4 | | 8 | | 512 | | 0.1 | 0.88 | 0.89 | 0.87 | 0.72 |
| 6 | | 8 | | 512 | | 0.1 | 0.90 | 0.93 | 0.95 | 0.74 |
| 12 | | 8 | | 512 | | 0.1 | 0.87 | 0.86 | 0.89 | 0.71 |
| **B. Heads Search** | | | | | | |  |  |  |  |
| 6 | | 4 | | 512 | | 0.1 | 0.89 | 0.92 | 0.92 | 0.74 |
| 6 | | 8 | | 512 | | 0.1 | 0.90 | 0.93 | 0.95 | 0.74 |
| 6 | | 12 | | 512 | | 0.1 | 0.77 | 0.84 | 0.87 | 0.72 |
| **C. Dim Search** | | | | | | |  |  |  |  |
| 6 | | 8 | | 256 | | 0.1 | 0.95 | 0.94 | 0.94 | 0.80 |
| 6 | | 8 | | 512 | | 0.1 | 0.90 | 0.93 | 0.95 | 0.74 |
| 6 | | 8 | | 1024 | | 0.1 | 0.82 | 0.90 | 0.91 | 0.73 |
| **D. Dropout Search** | | | | | | |  |  |  |  |
| 6 | | 8 | | 256 | | 0.1 | 0.95 | 0.94 | 0.94 | 0.80 |
| 6 | | 8 | | 256 | | 0.15 | 0.89 | 0.92 | 0.91 | 0.73 |
| 6 | | 8 | | 256 | | 0.3 | 0.78 | 0.89 | 0.87 | 0.72 |
| **E. Final Opt** | | | | | | |  |  |  |  |
| **6** | | **8** | | **256** | | **0.1** | **0.95** | **0.94** | **0.94** | **0.80** |
